# Supplementary material for: Wormlike core–shell nanoparticles formed by co-assembly of double hydrophilic block polyelectrolyte with oppositely charged fluorosurfactant
Source: Royal Society of Chemistry journal article supplement (doi:10.1039/c2sm25588j), 2012-01-01
Supplement: c2sm25588j.pdf [file c2sm25588j.pdf]

Electronic Supplementary Information for *Soft Matter* Manuscript:  
Wormlike Core-Shell Nanoparticles Formed by Co-Assembly of Double  
Hydrophilic Block Polyelectrolyte with Oppositely Charged  
Fluorosurfactant

Miroslav Štěpánek,<sup>\*a</sup> Juraj Škvarla,<sup>a</sup> Mariusz Uchman,<sup>a</sup> Karel Procházka,<sup>a</sup> Borislav Angelov,<sup>b</sup> Lubomír Kováčik,<sup>c</sup> Vasil M. Garamus,<sup>d</sup> Christos Mantzaridis<sup>e</sup> and Stergios Pispas<sup>\*e</sup>

<sup>a</sup> *Department of Physical and Macromolecular Chemistry, Faculty of Science, Charles University in Prague, Hlavova 2030, 128 40 Prague 2, Czech Republic. Fax: +42022499752; Tel: +420221951292; E-mail: stepanek@natur.cuni.cz*

<sup>b</sup> *Institute of Macromolecular Chemistry, Academy of Sciences of the Czech Republic, Heyrovský Square 2, 16206 Prague 6, Czech Republic*

<sup>c</sup> *Institute of Cellular Biology, 1st Faculty of Medicine, Charles University in Prague, Albertov 4, 128 01 Prague 2, Czech Republic*

<sup>d</sup> *Helmholtz-Zentrum Geesthacht, Centre for Materials and Coastal Research, D-21502 Geesthacht, Germany*

<sup>e</sup> *Theoretical & Physical Chemistry Institute, National Hellenic Research Foundation, 48 Vassileos Constantinou Avenue, 11635 Athens, Greece. Fax: +302107273824; Tel: +302107273794; E-mail: pispas@ie.gr*

**(i) Zoomed views of objects on Cryo-TEM micrographs of the PSCI-PEO/HFDPCI system at the stoichiometric ratio,  $\beta = 0.71$ :**

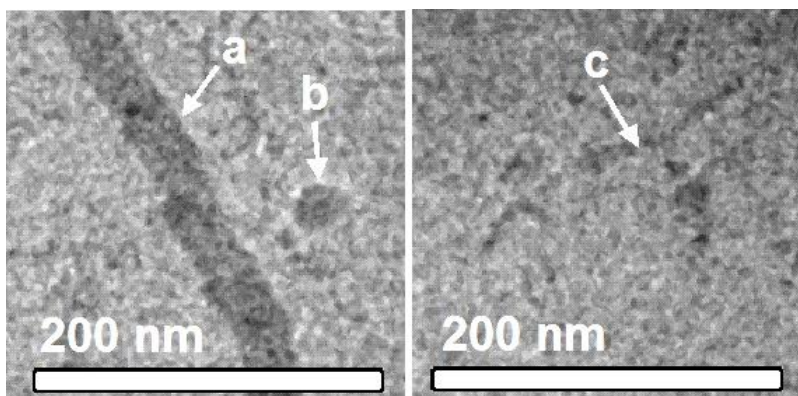

**Fig. S1.** Zoomed views of objects on Cryo-TEM micrographs of the PSCI-PEO/HFDPCI system at the stoichiometric ratio,  $\beta = 0.71$ : (a) PSCI-PEO/HFDPCI wormlike micelle, (b) PSCI-PEO/HFDPCI spherical micelle and (c) HFDPCI threadlike micelle.

**(ii) The model for the SAXS of PSCI-PEO/HFDPCI system at the stoichiometric ratio,  $\beta = 0.71$ :** The scattering function,  $I_{PE-S}(q)$ , consists of contributions from (i) wormlike particles, described by the form factor  $P_{worm}(q,L,b,R_c)$  for homogeneous semiflexible chain of the contour length  $L$ , the Kuhn length  $b$  and the cylindrical cross-section with the radius  $R_c$ , (ii) from spherical particles, treated by the simple form factor  $P_{sphere}(q,R_s)$  for homogeneous spheres of the radius  $R_s$ , and (iii) from densely packed surfactant micelles in the PE-S complex, described by the structure factor  $S_{cor}(q,l,\xi)$  for disordered cell-cell correlations with the characteristic distance between cells  $l$ , and the correlation length  $\xi$ . The overall scattering function is given by the expression,

$$I_{PE-S}(q) = I_1 P_{worm}(q,L,b,R_c) + I_2 P_{sphere}(q,R_s) + I_3 S_{cor}(q,l,\xi), \quad (S1)$$

where  $I_1$ ,  $I_2$ , respectively, are the forward scattering intensities for wormlike and spherical particles and  $I_3$  is the amplitude of the correlation peak.

*1. Wormlike particles.* The scattering from wormlike particles is given by the relationship<sup>1</sup>

$$P_{\text{worm}}(L, b, R_c, q) = P_{\text{cyl}}(R_c, q)P_{\text{chain}}(L, b, q), \quad (\text{S2})$$

where

$$P_{\text{cyl}}(R_c, q) = \left[ \frac{2J_1(qR_c)}{qR_c} \right]^2, \quad (\text{S3})$$

in which  $J_1(x)$  is the 1st order Bessel function, and

$$P_{\text{chain}}(q, L, b) = \left\{ \frac{2(e^{-u} + u - 1)}{u^2} + \left[ \frac{4}{15} + \frac{7}{15u} - \left( \frac{11}{15} + \frac{7}{15u} \right) e^{-u} \right] \frac{b}{L} \right\} \times \\ \times \exp \left[ - \left( \frac{qb}{q_1} \right)^{p_1} \right] + \left( \frac{1}{Lbq^2} + \frac{\pi}{Lq} \right) \left\{ 1 - \exp \left[ - \left( \frac{qb}{q_1} \right)^{p_1} \right] \right\}. \quad (\text{S4})$$

Here  $p_1 = 4.12$ ,  $q_1 = 5.53$  and

$$u = \frac{Lbq^2}{6} \left[ 1 - \frac{3b}{2L} + \frac{3b^2}{2L^2} - \frac{3b^3}{4L^3} (1 - e^{-2L/b}) \right] \left[ 1 + \left( \frac{L}{3.12b} \right)^2 + \left( \frac{L}{8.67b} \right)^3 \right]^{0.059}. \quad (\text{S5})$$

2. *Spherical particles.* Scattering from spherical particles is given by the relationship,

$$P_{\text{sphere}}(q, R_s) = \frac{9}{q^6 R_s^6} [\sin(qR_s) - qR_s \cos(qR_s)]^2. \quad (\text{S6})$$

3. *Correlation peak.* The structure factor for correlations between surfactant micelles in the PE-S complex is given by the formula,<sup>2</sup>

$$S_{\text{cor}}(q, l, \xi) = \frac{\xi^{-2}}{\xi^{-2} + (q - 2\pi/l)^2}. \quad (\text{S7})$$

- 1 J.S. Pedersen and P. Schurtenberger, *Macromolecules*, 1996, **29**, 7602.
- 2 N. Lei, C.R. Safinya, D. Roux and K.S. Liang, *Phys. Rev. E*, 1997, **56**, 608.
